# Supplementary material for: BRAHMA ATPase of the SWI/SNF Chromatin Remodeling Complex Acts as a Positive Regulator of Gibberellin-Mediated Responses in Arabidopsis
Source: PLoS One. 2013 Mar 11;8(3):e58588. doi: 10.1371/journal.pone.0058588 (PMC3594165; doi:10.1371/journal.pone.0058588)
Supplement: Table S6 — Differentially expressed genes in ga1-3/brm-1 mutant that are also changed in the same direction in brm-1 and ga1-3 . (XLSX) [file pone.0058588.s012.xlsx]

## Sheet: Arkusz1
Table S6. Differentially expressed genes in ga1-3/brm-1 mutant that are also changed in the same direction in brm-1 and ga1-3 (419 genes; Fc>1.5; FDR<0.05)
				ga1-3/brm-1 vs wt
Probeset ID	Gene	description	locus	p-value	Fold-Change
262682_at	---	family II extracellular lipase 3 (EXL3)	AT1G75900	8.4548e-08	12.7375
247573_at	AACT1	AACT1 (anthocyanin 5-aromatic acyltransferase 1); transferase/ transferase, tran	AT5G61160	1.86286e-06	-92.8528
267364_at	ELF4	ELF4 (EARLY FLOWERING 4)	AT2G40080	3.06802e-06	26.9224
254163_s_at	---	[AT4G24340, phosphorylase family protein];[AT4G24350, phosphorylase family prote	AT4G24340	2.91026e-06	-21.4451
247776_at	PLC4	phosphoinositide-specific phospholipase C family protein	AT5G58700	1.1917e-07	12.7058
266884_at	UCC2	UCC2 (UCLACYANIN 2); copper ion binding / electron carrier	AT2G44790	1.93508e-05	-16.9759
266279_at	---	tropinone reductase, putative / tropine dehydrogenase, putative	AT2G29290	6.73302e-09	-23.2032
266719_at	CCA1	CCA1 (CIRCADIAN CLOCK ASSOCIATED 1); DNA binding / transcription activator/ tran	AT2G46830	1.2283e-05	-12.08
251869_at	---	FUNCTIONS IN: molecular_function unknown; INVOLVED IN: biological_process unknow	AT3G54500	5.92439e-07	-15.6812
254150_at	---	phosphorylase family protein	AT4G24350	5.13784e-06	-27.903
258497_at	COL2	COL2 (constans-like 2); transcription factor/ zinc ion binding	AT3G02380	9.2661e-06	-14.275
265699_at	---	hydrolase	AT2G03550	2.64382e-07	-26.2182
247937_at	ACA8	ACA8 (AUTOINHIBITED CA2+ -ATPASE, ISOFORM 8); calcium-transporting ATPase/ calmo	AT5G57110	8.24499e-06	6.04383
259927_at	JAC1	JAC1 (J-DOMAIN PROTEIN REQUIRED FOR CHLOROPLAST ACCUMULATION RESPONSE 1); heat s	AT1G75100	3.32422e-08	-9.71654
265121_at	FMO GS-OX3	FMO GS-OX3 (FLAVIN-MONOOXYGENASE GLUCOSINOLATE S-OXYGENASE 3); 3-methylthiopropy	AT1G62560	1.19195e-06	14.6952
257952_at	---	peroxidase 30 (PER30) (P30) (PRXR9)	AT3G21770	1.40395e-05	40.6111
259832_at	---	transcription factor	AT1G69580	1.08968e-05	4.79857
249174_at	---	unknown protein	AT5G42900	0.000107459	30.4335
252300_at	---	pyruvate kinase family protein	AT3G49160	4.62088e-05	-6.94823
262978_at	TUB1	TUB1; GTP binding / GTPase/ structural molecule	AT1G75780	1.44638e-05	6.73131
259244_at	COL9	COL9 (CONSTANS-LIKE 9); transcription factor/ zinc ion binding	AT3G07650	1.83579e-05	18.1011
264741_at	---	aspartyl protease family protein	AT1G62290	2.16805e-07	14.5121
247488_at	---	FUNCTIONS IN: molecular_function unknown; INVOLVED IN: biological_process unknow	AT5G61820	1.49808e-06	7.41331
250012_x_at	---	auxin-responsive protein, putative	AT5G18060	1.78363e-05	-9.15443
263252_at	STH	STH; protein domain specific binding / transcription factor/ zinc ion binding	AT2G31380	2.51822e-05	-11.0556
250099_at	---	myb family transcription factor	AT5G17300	6.95843e-06	-7.48517
259599_at	SCPL45	SCPL45 (SERINE CARBOXYPEPTIDASE-LIKE 45 PRECURSOR); serine-type carboxypeptidase	AT1G28110	4.46864e-06	4.74297
252391_at	---	apolipoprotein D-related	AT3G47860	2.36247e-08	4.50701
262935_at	AtOCT5	AtOCT5 (Arabidopsis thaliana ORGANIC CATION/CARNITINE TRANSPORTER5); carbohydrat	AT1G79410	6.63464e-06	13.2738
248496_at	---	nodulin MtN3 family protein	AT5G50790	1.56063e-06	-14.5647
247525_at	TOC1	TOC1 (TIMING OF CAB EXPRESSION 1); transcription regulator/ two-component respon	AT5G61380	1.3564e-05	5.73673
250161_at	---	amino acid transporter family protein	AT5G15240	5.77213e-06	-4.08817
263536_at	WRKY60	WRKY60; transcription factor	AT2G25000	6.95575e-09	7.59865
260028_at	---	INVOLVED IN: biological_process unknown; LOCATED IN: plasma membrane, anchored t	AT1G29980	3.76215e-06	6.05861
257272_at	---	nodulin MtN21 family protein	AT3G28130	3.67557e-05	3.70894
253581_at	---	hydrophobic protein, putative / low temperature and salt responsive protein, put	AT4G30660	1.65112e-06	3.23134
248564_at	---	DNA-binding protein-related	AT5G49700	2.34241e-06	-21.4244
260776_at	---	zinc finger (C2H2 type) family protein	AT1G14580	4.03342e-05	-7.90705
248551_at	WR3	WR3 (WOUND-RESPONSIVE 3); nitrate transmembrane transporter	AT5G50200	0.000843403	-2.0559
262736_at	---	GDSL-motif lipase, putative	AT1G28570	8.26954e-07	6.40724
247668_at	APRR3	APRR3 (ARABIDOPSIS PSEUDO-RESPONSE REGULATOR 3); transcription regulator/ two-co	AT5G60100	6.88079e-06	6.0952
248744_at	---	zinc finger (B-box type) family protein	AT5G48250	4.20163e-05	6.62614
252475_s_at	PCL1	[AT5G59570, myb family transcription factor];[AT3G46640, PCL1 (PHYTOCLOCK 1); DN	AT5G59570	3.30383e-05	3.83761
252265_at	DIN11	DIN11 (DARK INDUCIBLE 11); iron ion binding / oxidoreductase	AT3G49620	0.000303966	-8.11682
251024_at	---	amino acid transporter family protein	AT5G02180	1.43354e-06	-10.2465
247040_at	---	transferase family protein	AT5G67150	1.14864e-05	4.52826
248801_at	HAT2	HAT2; DNA binding / transcription factor/ transcription repressor	AT5G47370	6.27419e-06	-4.22764
259040_at	ATGSTU8	ATGSTU8 (GLUTATHIONE S-TRANSFERASE TAU 8); glutathione transferase	AT3G09270	6.38313e-06	12.8956
247679_at	---	oxidoreductase, 2OG-Fe(II) oxygenase family protein	AT5G59540	4.42164e-05	-3.22093
247951_at	ORP4C	ORP4C (OSBP(OXYSTEROL BINDING PROTEIN)-RELATED PROTEIN 4C); oxysterol binding	AT5G57240	1.78819e-05	9.5754
261586_at	---	speckle-type POZ protein-related	AT1G01640	2.72426e-07	5.50639
250753_at	UGT76C2	UGT76C2; UDP-glycosyltransferase/ cis-zeatin O-beta-D-glucosyltransferase/ cytok	AT5G05860	8.48933e-06	7.55713
256266_at	---	unknown protein	AT3G12320	1.21361e-05	-15.0191
253268_s_at	UGT73B2	[AT4G34131, UGT73B3 (UDP-glucosyl transferase 73B3); UDP-glycosyltransferase/ ab	AT4G34131	7.44385e-07	9.87779
265277_at	---	unknown protein	AT2G28410	5.08342e-06	5.2298
245029_at	YAB5	YAB5 (YABBY5); transcription factor	AT2G26580	3.15799e-05	-3.29375
246510_at	DND1	DND1 (DEFENSE NO DEATH 1); calcium channel/ calmodulin binding / cation channel/	AT5G15410	5.9849e-06	-5.23365
254665_at	---	glycosyl hydrolase family 17 protein	AT4G18340	2.42612e-05	-3.15876
246523_at	COL1	COL1 (constans-like 1); transcription factor/ zinc ion binding	AT5G15850	7.44869e-06	-6.79852
250002_at	AGP25	AGP25 (ARABINOGALACTAN PROTEINS 25)	AT5G18690	5.20792e-05	4.01033
259823_at	---	glycosyl hydrolase family 17 protein	AT1G66250	0.00013002	4.26537
246756_at	---	protein phosphatase 2C, putative / PP2C, putative	AT5G27930	1.16592e-08	3.99764
247120_at	---	amino acid transporter family protein	AT5G65990	1.97514e-05	3.32553
246829_at	ATGWD3	ATGWD3; carbohydrate kinase/ catalytic/ phosphoglucan, water dikinase	AT5G26570	1.16091e-05	3.11517
256793_at	---	VQ motif-containing protein	AT3G22160	2.22434e-05	-2.19247
265672_at	---	cysteine proteinase inhibitor-related	AT2G31980	7.76752e-08	62.7945
262531_at	---	ATP binding / protein binding / protein kinase/ protein serine/threonine kinase/	AT1G17230	4.04461e-06	-4.6671
258970_at	scpl49	scpl49 (serine carboxypeptidase-like 49); serine-type carboxypeptidase	AT3G10410	6.53544e-08	3.03166
251059_at	CIPK15	CIPK15 (CBL-INTERACTING PROTEIN KINASE 15); kinase/ protein kinase	AT5G01810	0.000742603	-1.99547
259856_at	---	unknown protein	AT1G68440	3.87224e-06	-3.13768
259275_at	---	unknown protein	AT3G01060	0.000655254	-3.94212
250723_at	---	carboxy-lyase	AT5G06300	0.00151876	-2.94299
245319_at	---	FUNCTIONS IN: molecular_function unknown; INVOLVED IN: biological_process unknow	AT4G16146	6.5964e-06	4.22378
262325_at	---	disease resistance-responsive family protein / dirigent family protein	AT1G64160	1.86418e-05	-18.1192
264535_at	---	SEC14 cytosolic factor family protein / phosphoglyceride transfer family protein	AT1G55690	2.51171e-05	3.31602
258122_at	ATGSL04	ATGSL04 (glucan synthase-like 4); 1,3-beta-glucan synthase/ transferase, transfe	AT3G14570	2.88029e-05	-2.72008
259595_at	---	zinc finger (B-box type) family protein	AT1G28050	7.96786e-06	3.5438
260688_at	---	unknown protein	AT1G17665	1.14017e-05	4.98627
258100_at	---	MATE efflux family protein	AT3G23550	4.29061e-05	-5.21951
245859_at	ATNEK3	ATNEK3 (NIMA-RELATED KINASE3); ATP binding / kinase/ protein kinase/ protein ser	AT5G28290	7.71587e-06	2.61075
259790_s_at	---	[AT1G29430, auxin-responsive family protein];[AT5G27780, auxin-responsive family	AT1G29430	1.19503e-05	-18.7718
265900_at	---	unknown protein	AT2G25730	0.000103358	1.9611
249337_at	---	glycerophosphoryl diester phosphodiesterase family protein	AT5G41080	3.42893e-06	-8.8224
255619_s_at	---	[AT4G01350, protein binding / zinc ion binding];[AT5G59920, ULI3; diacylglycerol	AT4G01350	0.000251698	-2.22774
256446_at	---	zinc finger (C3HC4-type RING finger) family protein	AT3G11110	0.000809992	-3.23118
266362_at	---	galactosyltransferase family protein	AT2G32430	0.000218124	2.12134
266474_at	---	unknown protein	AT2G31110	1.08366e-05	-5.53481
260637_at	ACO2	ACO2 (ACC OXIDASE 2); 1-aminocyclopropane-1-carboxylate oxidase	AT1G62380	0.00243653	-1.52868
266959_at	MCM5	minichromosome maintenance family protein / MCM family protein	AT2G07690	0.000149446	3.01261
259373_at	---	unknown protein	AT1G69160	3.41266e-05	-3.67252
245450_at	---	disease resistance protein-related	AT4G16880	1.57744e-05	-4.69001
253496_at	ATGPX7	ATGPX7 (glutathione peroxidase 7); glutathione peroxidase	AT4G31870	2.1011e-05	-5.60236
267127_at	MES3	MES3 (METHYL ESTERASE 3); hydrolase, acting on ester bonds / methyl indole-3-ace	AT2G23610	9.16067e-06	-2.1343
253281_at	UGT73B1	UGT73B1 (UDP-glucosyl transferase 73B1); UDP-glycosyltransferase/ abscisic acid	AT4G34138	3.17113e-07	3.98017
249035_at	GLK2	GLK2 (GOLDEN2-LIKE 2); DNA binding / transcription factor/ transcription regulat	AT5G44190	1.26559e-06	-4.68625
256415_at	---	GDSL-motif lipase/hydrolase family protein	AT3G11210	0.000147758	3.10549
260385_at	SOT18	SOT18 (DESULFO-GLUCOSINOLATE SULFOTRANSFERASE 18); 3-methylthiopropyl-desulfoglu	AT1G74090	1.11247e-05	3.05331
263548_at	CCR2	CCR2 (COLD, CIRCADIAN RHYTHM, AND RNA BINDING 2); RNA binding / double-stranded	AT2G21660	5.98108e-06	4.23103
254564_at	NCED4	NCED4 (NINE-CIS-EPOXYCAROTENOID DIOXYGENASE 4)	AT4G19170	8.84534e-06	-18.7104
257600_at	CLE41	CLE41 (CLAVATA3/ESR-RELATED 41); protein binding / receptor binding	AT3G24770	1.62788e-05	6.9424
266415_at	LTP2	LTP2 (LIPID TRANSFER PROTEIN 2); lipid binding	AT2G38530	1.29666e-05	8.8919
264343_at	---	unknown protein	AT1G11850	8.08282e-05	3.9764
252212_at	MAPKKK20	MAPKKK20; ATP binding / kinase/ protein kinase/ protein serine/threonine kinase	AT3G50310	0.0010374	-2.86121
247589_at	REV	REV (REVOLUTA); DNA binding / lipid binding / transcription factor	AT5G60690	1.70665e-05	2.71329
263032_at	---	unknown protein	AT1G23850	0.00318996	-2.28342
252442_at	---	deoxyuridine 5'-triphosphate nucleotidohydrolase family	AT3G46940	7.3969e-06	3.51298
251013_at	---	short-chain dehydrogenase/reductase (SDR) family protein	AT5G02540	0.000634151	-3.79486
261591_at	---	protein kinase family protein	AT1G01740	0.00635706	-1.61624
263632_at	---	unknown protein	AT2G04795	2.68331e-06	-3.22886
248646_at	---	unknown protein	AT5G49100	9.6184e-06	2.84406
251248_at	PGP21	PGP21 (P-GLYCOPROTEIN 21); ATPase, coupled to transmembrane movement of substanc	AT3G62150	0.000679965	-2.38073
247696_at	MYB59	MYB59 (MYB DOMAIN PROTEIN 59); DNA binding / transcription factor	AT5G59780	9.56888e-05	-3.4664
260956_at	STO	STO (SALT TOLERANCE); DNA binding / protein binding / transcription factor/ zinc	AT1G06040	2.29678e-06	-3.53086
266983_at	---	hydrolase, alpha/beta fold family protein	AT2G39400	3.70219e-06	-4.45854
260496_at	---	ATPase, coupled to transmembrane movement of substances / amino acid transmembra	AT2G41700	0.00121821	-1.54332
267116_at	---	F-box family protein	AT2G32560	7.61926e-05	-2.79191
254384_at	---	26.5 kDa class P-related heat shock protein (HSP26.5-P)	AT4G21870	0.000321517	-6.1926
258151_at	BGLU44	BGLU44 (B-S GLUCOSIDASE 44); (R)-amygdalin beta-glucosidase/ 4-methylumbellifery	AT3G18080	3.40909e-05	3.03072
267036_at	---	unknown protein	AT2G38465	5.57237e-05	2.31685
259784_at	---	auxin-responsive protein, putative	AT1G29450	3.83565e-05	-5.47708
250307_at	---	unknown protein	AT5G12170	2.71276e-05	-1.81355
263136_at	ATTPS1	ATTPS1 (TREHALOSE-6-PHOSPHATE SYNTHASE); alpha,alpha-trehalose-phosphate synthas	AT1G78580	4.6221e-06	4.2763
250657_at	ST2B	ST2B (SULFOTRANSFERASE 2B); hydroxyjasmonate sulfotransferase/ sulfotransferase	AT5G07000	7.22437e-05	-6.92668
253326_at	---	glycoside hydrolase family 28 protein / polygalacturonase (pectinase) family pro	AT4G33440	1.77984e-05	4.04316
266839_at	ELF3	ELF3 (EARLY FLOWERING 3); protein C-terminus binding / transcription factor	AT2G25930	6.38799e-05	2.44896
255654_at	---	protein kinase family protein	AT4G00970	0.0011944	-3.93794
247459_at	---	embryo-specific protein-related	AT5G62200	1.20013e-06	1.99772
262730_at	ATOCT3	ATOCT3 (ARABIDOPSIS THALIANA ORGANIC CATION/CARNITINE TRANSPORTER 3); carbohydra	AT1G16390	6.87905e-08	-5.22017
252363_at	---	GDSL-motif lipase/hydrolase family protein	AT3G48460	0.0155661	2.31367
260118_s_at	---	[AT1G33940, FUNCTIONS IN: molecular_function unknown; INVOLVED IN: biological_pr	AT1G33940	0.000171098	2.92046
248932_at	PTR3	PTR3 (PEPTIDE TRANSPORTER 3); dipeptide transporter/ transporter/ tripeptide tra	AT5G46050	1.41185e-05	4.59543
263882_at	RNR1	RNR1 (RIBONUCLEOTIDE REDUCTASE 1); ATP binding / protein binding / ribonucleosid	AT2G21790	3.36774e-05	4.13372
255070_at	ISA3	ISA3 (ISOAMYLASE 3); alpha-amylase/ isoamylase	AT4G09020	4.04995e-06	2.37528
262783_at	---	ATP binding / protein binding / protein kinase/ protein serine/threonine kinase	AT1G10850	0.000143003	4.00341
249456_at	---	binding / catalytic	AT5G39410	6.17848e-06	3.18789
252956_at	ATFP6	ATFP6 (FARNESYLATED PROTEIN 6); metal ion binding	AT4G38580	0.000457608	1.68301
254746_at	---	auxin-responsive protein, putative	AT4G12980	1.0844e-06	-4.8727
263777_at	ATCNGC12	ATCNGC12; cation channel/ cyclic nucleotide binding / ion channel	AT2G46450	0.00100065	-1.69982
251197_at	---	glutaredoxin family protein	AT3G62960	6.84727e-07	-4.46621
259663_at	PRA7	PRA7	AT1G55190	0.00191425	1.68214
255438_at	AOP1	AOP1; oxidoreductase, acting on paired donors, with incorporation or reduction o	AT4G03070	4.48212e-05	3.29144
257056_at	---	glycosyltransferase family 14 protein / core-2/I-branching enzyme family protein	AT3G15350	3.73152e-05	2.93522
256456_at	---	unknown protein	AT1G75180	7.39918e-07	-2.91202
251797_at	AGF2	AGF2 (AT-hook protein of GA feedback 2)	AT3G55560	6.68591e-06	-1.92594
260580_at	---	serine-type endopeptidase/ serine-type peptidase	AT2G47390	8.02743e-06	2.16729
248410_at	---	band 7 family protein	AT5G51570	0.000322126	2.43109
266950_at	---	hydroxyproline-rich glycoprotein family protein	AT2G18910	0.000129468	-2.13368
246055_at	AtAGAL1	AtAGAL1 (Arabidopsis thaliana ALPHA-GALACTOSIDASE 1); alpha-galactosidase/ catal	AT5G08380	5.55763e-05	2.56044
249922_at	AILP1	AILP1	AT5G19140	4.25481e-05	-3.28407
262505_at	---	FUNCTIONS IN: molecular_function unknown; INVOLVED IN: biological_process unknow	AT1G21680	2.56998e-05	2.10037
251301_at	CYP78A9	CYP78A9 (CYTOCHROME P450 78A9); monooxygenase/ oxygen binding	AT3G61880	1.58901e-05	-2.88858
260820_at	---	leucine-rich repeat transmembrane protein kinase, putative	AT1G06840	5.01962e-05	-2.96623
259708_at	---	hydrolase, alpha/beta fold family protein	AT1G77420	1.37369e-05	-2.47174
266227_at	---	unknown protein	AT2G28870	3.20029e-05	3.12944
258421_at	---	nodulin MtN3 family protein	AT3G16690	0.000198608	-2.4014
257823_at	---	nodulin, putative	AT3G25190	0.000978679	-5.02174
255364_s_at	---	[AT4G22240, plastid-lipid associated protein PAP, putative];[AT4G04020, FIB (FIB	AT4G22240	0.000393979	-1.91647
253650_at	---	subtilase family protein	AT4G30020	3.51525e-07	4.59205
253754_at	---	glycine-rich protein	AT4G29020	2.64728e-05	5.99943
258326_at	SOL1	SOL1; transcription factor	AT3G22760	4.08176e-06	8.85107
250694_at	HAT14	HAT14 (HOMEOBOX FROM ARABIDOPSIS THALIANA); DNA binding / transcription factor	AT5G06710	0.000168041	-2.48415
246952_at	OFP13	OFP13 (ARABIDOPSIS THALIANA OVATE FAMILY PROTEIN 13)	AT5G04820	0.000799613	2.03045
247716_at	---	unknown protein	AT5G59350	0.000191285	2.91874
250443_at	RBK1	RBK1 (Rop Binding protein Kinases 1); ATP binding / kinase/ protein kinase/ prot	AT5G10520	0.00277368	-1.95927
262261_at	CLE17	CLE17 (CLAVATA3/ESR-RELATED 17); protein binding / receptor binding	AT1G70895	0.000112086	-2.20414
262040_at	TMM	TMM (TOO MANY MOUTHS); protein binding / receptor	AT1G80080	8.67267e-05	5.45194
260037_at	RAV2	RAV2 (REGULATOR OF THE ATPASE OF THE VACUOLAR MEMBRANE); DNA binding / transcrip	AT1G68840	0.00846	-1.94438
250091_at	---	unknown protein	AT5G17340	0.000381112	-4.40224
248423_at	---	unknown protein	AT5G51670	1.17469e-06	-2.61319
259095_at	ACP1	ACP1 (acyl carrier protein 1); acyl carrier	AT3G05020	0.000143916	-1.81226
262536_at	---	SOUL heme-binding family protein	AT1G17100	3.22598e-05	3.93756
251160_at	---	endonuclease/exonuclease/phosphatase family protein	AT3G63240	1.26358e-05	-2.13619
257932_at	HCF107	HCF107 (HIGH CHLOROPHYLL FLUORESCENT 107); binding	AT3G17040	6.35561e-08	-4.12196
253292_at	---	unknown protein	AT4G33985	0.000121276	3.93001
251244_at	---	pectinacetylesterase family protein	AT3G62060	0.000471297	2.06898
253971_at	---	fructose-bisphosphate aldolase, putative	AT4G26530	0.000138947	-3.97884
253331_at	---	aspartic-type endopeptidase	AT4G33490	7.81889e-05	3.2172
256503_at	ATRL6	ATRL6 (ARABIDOPSIS RAD-LIKE 6); transcription factor	AT1G75250	1.82053e-07	-4.73057
254544_at	---	glycosyl hydrolase family 18 protein	AT4G19820	1.14018e-06	-7.08757
260429_at	JAZ6	JAZ6 (JASMONATE-ZIM-DOMAIN PROTEIN 6)	AT1G72450	0.000811292	-3.56145
267517_at	RPT2	RPT2 (ROOT PHOTOTROPISM 2); protein binding	AT2G30520	1.46469e-05	-3.59885
248703_at	---	aspartic-type endopeptidase	AT5G48430	2.99571e-05	-8.16596
260137_at	---	senescence-associated family protein	AT1G66330	9.3607e-06	-2.52025
249118_at	---	phosphoinositide binding	AT5G43870	0.00101657	-2.09077
259751_at	MYBL2	MYBL2 (ARABIDOPSIS MYB-LIKE 2); DNA binding / transcription factor	AT1G71030	4.85447e-07	-7.00165
248148_at	---	AT hook motif-containing protein	AT5G54930	0.000630287	2.148
256970_at	---	ABC transporter family protein	AT3G21090	0.00717044	2.1726
261272_at	---	FUNCTIONS IN: molecular_function unknown; INVOLVED IN: biological_process unknow	AT1G26665	0.00124418	1.54454
262713_at	---	unknown protein	AT1G16520	9.29649e-05	3.23563
262629_at	ACD32.1	ACD32.1 (ALPHA-CRYSTALLIN DOMAIN 32.1)	AT1G06460	0.00011448	2.07138
260728_at	---	serine/threonine protein kinase, putative	AT1G48210	0.0017551	2.46659
262892_at	ALDH5F1	ALDH5F1; 3-chloroallyl aldehyde dehydrogenase/ NAD or NADH binding / succinate-s	AT1G79440	3.42247e-05	2.17223
252963_at	---	unknown protein	AT4G38820	0.000423237	-3.00771
245524_at	---	INVOLVED IN: biological_process unknown; LOCATED IN: endomembrane system, integr	AT4G15920	8.68168e-05	-2.43459
263126_at	---	SOUL heme-binding family protein	AT1G78460	0.00124556	-2.15229
248067_at	---	agenet domain-containing protein / bromo-adjacent homology (BAH) domain-containi	AT5G55600	1.6692e-05	-2.40533
265172_at	SPDS1	SPDS1 (spermidine synthase 1); spermidine synthase	AT1G23820	4.50924e-06	2.01181
251795_at	---	integral membrane family protein	AT3G55390	4.32074e-05	2.69166
251144_at	---	transferase family protein	AT5G01210	8.06233e-05	-2.72658
255381_at	RMA1	RMA1; protein binding / ubiquitin-protein ligase/ zinc ion binding	AT4G03510	4.72662e-05	-3.59621
259008_at	MT2A	MT2A (METALLOTHIONEIN 2A); copper ion binding	AT3G09390	7.18367e-05	2.12804
249065_at	---	zinc finger (CCCH-type) family protein	AT5G44260	2.59483e-06	-4.44862
263779_at	SPA1	SPA1 (SUPPRESSOR OF PHYA-105 1); protein binding / signal transducer	AT2G46340	6.48474e-06	-3.58644
267066_at	---	methyltransferase-related	AT2G41040	5.38899e-05	-1.66667
248911_at	DOG1	DOG1 (DELAY OF GERMINATION 1)	AT5G45830	4.36456e-08	-5.00085
264455_at	---	pentatricopeptide (PPR) repeat-containing protein	AT1G10330	2.16377e-07	-2.01671
257154_at	---	unknown protein	AT3G27210	2.38151e-06	6.76996
246326_at	REV7	REV7; DNA binding	AT1G16590	4.80475e-05	-2.00052
265724_at	OFP16	OFP16 (ARABIDOPSIS THALIANA OVATE FAMILY PROTEIN 16)	AT2G32100	5.49493e-06	-7.44242
245463_at	ATEXLB1	ATEXLB1 (ARABIDOPSIS THALIANA EXPANSIN-LIKE B1)	AT4G17030	0.000100839	-4.73751
253300_at	BCA5	carbonic anhydrase family protein / carbonate dehydratase family protein	AT4G33580	1.20426e-05	-2.50394
245031_at	---	binding	AT2G26360	0.000111296	-1.80443
250005_at	---	zinc finger (C3HC4-type RING finger) family protein	AT5G18760	3.48896e-05	-2.15731
264708_at	---	ethylene-responsive protein, putative	AT1G09740	0.00130606	2.13712
254281_at	---	bile acid:sodium symporter family protein	AT4G22840	8.04543e-05	-3.40746
257766_at	IAA2	IAA2 (INDOLE-3-ACETIC ACID INDUCIBLE 2); transcription factor	AT3G23030	2.36399e-05	-2.44161
258114_at	CYP72A13	CYP72A13; electron carrier/ heme binding / iron ion binding / monooxygenase/ oxy	AT3G14660	9.75106e-05	1.9086
263128_at	LZF1	LZF1 (LIGHT-REGULATED ZINC FINGER PROTEIN 1); transcription factor/ zinc ion bin	AT1G78600	1.63225e-05	-3.68925
245906_at	---	unknown protein	AT5G11070	1.10258e-06	2.0044
265913_at	---	unknown protein	AT2G25625	0.0140834	1.62859
262580_at	---	CBS domain-containing protein	AT1G15330	5.21959e-07	-4.95981
251815_at	CXIP1	CXIP1 (CAX INTERACTING PROTEIN 1); antiporter/ glutathione disulfide oxidoreduct	AT3G54900	1.86843e-06	-1.93392
266672_at	PHT4;1	PHT4;1; carbohydrate transmembrane transporter/ inorganic diphosphate transmembr	AT2G29650	0.000777748	-2.30875
260973_at	---	DNA binding	AT1G53490	3.82296e-09	-4.50429
260941_at	---	peroxidase, putative	AT1G44970	9.29237e-05	-21.0251
252661_at	---	unknown protein	AT3G44450	7.88317e-05	-2.68822
257024_at	---	calcium-dependent protein kinase, putative / CDPK, putative	AT3G19100	0.000109533	2.7113
246480_at	---	chaperonin, putative	AT5G16070	7.93033e-07	1.78917
256799_at	---	unknown protein	AT3G18560	9.5159e-06	-4.66991
254705_at	---	FUNCTIONS IN: molecular_function unknown; INVOLVED IN: biological_process unknow	AT4G17870	0.00068222	-1.79956
249377_at	---	INVOLVED IN: biological_process unknown; EXPRESSED IN: 18 plant structures; EXPR	AT5G40690	0.00185022	2.52455
250751_at	---	UDP-glucoronosyl/UDP-glucosyl transferase family protein	AT5G05890	5.55035e-05	-1.937
249777_at	---	lipase class 3 family protein	AT5G24210	0.000202373	-4.08682
250381_at	---	exostosin family protein	AT5G11610	6.75204e-05	-1.80249
247689_at	---	FUNCTIONS IN: molecular_function unknown; INVOLVED IN: biological_process unknow	AT5G59770	0.000580652	-1.60886
256574_at	---	FUNCTIONS IN: molecular_function unknown; INVOLVED IN: biological_process unknow	AT3G14780	0.000142966	-3.18535
251996_at	BGAL2	BGAL2 (beta-galactosidase 2); beta-galactosidase/ catalytic/ cation binding	AT3G52840	9.88779e-06	-3.23791
247780_at	---	dehydrodolichyl diphosphate synthase, putative / DEDOL-PP synthase, putative	AT5G58770	0.00165448	-2.02562
261141_at	---	ATP-dependent protease La (LON) domain-containing protein	AT1G19740	8.86147e-06	-2.0285
248071_at	---	RNA recognition motif (RRM)-containing protein	AT5G55670	6.77907e-05	-1.83378
245422_at	---	palmitoyl protein thioesterase family protein	AT4G17470	9.03784e-05	-11.0135
257506_at	---	FUNCTIONS IN: molecular_function unknown; INVOLVED IN: response to auxin stimulu	AT1G29440	0.000178007	-8.70138
256181_at	---	leucine-rich repeat protein kinase, putative	AT1G51820	0.00218515	-1.77433
246816_at	---	INVOLVED IN: biological_process unknown; EXPRESSED IN: seed; EXPRESSED DURING: E	AT5G27230	0.00146405	-1.82804
259871_at	---	nodulin, putative	AT1G76800	0.0104547	-2.23173
250175_at	---	FUNCTIONS IN: molecular_function unknown; INVOLVED IN: biological_process unknow	AT5G14390	0.000151492	1.5624
259596_at	GH3.17	GH3.17; indole-3-acetic acid amido synthetase	AT1G28130	8.93209e-05	4.36399
259681_at	NIA1	NIA1 (NITRATE REDUCTASE 1); nitrate reductase	AT1G77760	0.000144703	5.02413
266071_at	---	[AT2G18680, unknown protein];[AT2G18670, zinc finger (C3HC4-type RING finger) fa	AT2G18680	0.00141579	-1.87987
250100_at	GLN1;4	GLN1;4; glutamate-ammonia ligase	AT5G16570	0.000147659	-4.24123
263184_at	UGT75B1	UGT75B1 (UDP-GLUCOSYLTRANSFERASE 75B1); UDP-glucose:4-aminobenzoate acylglucosyl	AT1G05560	3.46803e-07	9.83603
247214_at	---	unknown protein	AT5G64850	1.28122e-05	-4.71183
256305_at	MRP1	MRP1 (ARABIDOPSIS THALIANA MULTIDRUG RESISTANCE-ASSOCIATED PROTEIN 1); ATPase, c	AT1G30400	0.000127441	1.84059
263133_at	---	SOUL heme-binding family protein	AT1G78450	6.99028e-08	-3.44306
267461_at	---	dormancy/auxin associated family protein	AT2G33830	0.000197985	1.66788
267063_at	---	unknown protein	AT2G41120	3.76259e-05	-2.24879
258623_at	---	zinc finger (C2H2 type) family protein	AT3G02790	1.38739e-06	2.32026
249366_at	---	glycerol-3-phosphate dehydrogenase (NAD+) / GPDH	AT5G40610	0.00299768	-1.55623
267280_at	TAG1	TAG1 (TRIACYLGLYCEROL BIOSYNTHESIS DEFECT 1); diacylglycerol O-acyltransferase	AT2G19450	2.03769e-05	2.34075
249887_at	---	unknown protein	AT5G22310	0.000722493	-2.05582
251529_at	---	DEAD box RNA helicase, putative	AT3G58570	0.000118819	1.86105
258437_at	---	protein phosphatase 2C-related / PP2C-related	AT3G16560	0.000499123	2.49866
260655_at	---	pathogenesis-related thaumatin family protein	AT1G19320	5.00191e-05	-1.51456
251155_at	---	unknown protein	AT3G63160	2.76572e-05	2.44482
250133_at	TRXF2	ATF2; enzyme activator	AT5G16400	2.95246e-05	-2.45613
266385_at	PR1	PR1 (PATHOGENESIS-RELATED GENE 1)	AT2G14610	0.00821293	9.43816
253258_at	---	DNA binding / transcription factor	AT4G34400	0.000120575	-3.14216
259331_at	---	auxin-responsive protein, putative	AT3G03840	0.000501459	-2.65159
262092_at	---	auxin-responsive family protein	AT1G56150	0.000787309	-2.77712
258094_at	CYP72A15	CYP72A15; electron carrier/ heme binding / iron ion binding / monooxygenase/ oxy	AT3G14690	0.000104908	1.76357
260190_at	---	lipoxygenase family protein	AT1G67560	1.20851e-05	-1.97938
260614_at	---	ATPase, coupled to transmembrane movement of substances	AT1G53390	0.000101	-1.81694
253860_at	---	rhodanese-like domain-containing protein	AT4G27700	1.05171e-05	-1.87994
254938_at	OPT7	OPT7 (OLIGOPEPTIDE TRANSPORTER 7); oligopeptide transporter	AT4G10770	1.17671e-06	-2.46858
245993_at	---	senescence-associated protein-related	AT5G20700	9.77292e-06	4.95381
249485_at	---	protein kinase family protein	AT5G39020	0.000173946	-2.11848
258033_at	MRP6	ATMRP6; ATPase, coupled to transmembrane movement of substances	AT3G21250	2.0285e-06	6.18977
246411_at	---	amine oxidase family	AT1G57770	0.00743449	-1.73168
263490_at	MAX2	MAX2 (MORE AXILLARY BRANCHES 2); ubiquitin-protein ligase	AT2G42620	5.54322e-05	-2.45005
264021_at	---	auxin-responsive protein, putative	AT2G21200	4.59215e-06	-2.04671
251151_at	---	chalcone isomerase	AT3G63170	0.000642919	1.68651
247819_at	WNK4	WNK4 (WITH NO K (=LYSINE) 4); kinase/ protein kinase	AT5G58350	4.09971e-05	2.26395
257798_at	NAI2	NAI2	AT3G15950	2.12122e-05	6.62904
251084_at	---	zinc finger (C3HC4-type RING finger) family protein	AT5G01520	3.06313e-05	-3.92099
265713_at	UPS2	UPS2 (UREIDE PERMEASE 2)	AT2G03530	0.000106148	-2.6683
248070_at	---	LOCATED IN: mitochondrion; EXPRESSED IN: 24 plant structures; EXPRESSED DURING:	AT5G55660	0.000166697	-1.79472
262700_at	---	INVOLVED IN: biological_process unknown; LOCATED IN: cell wall, vacuole; EXPRESS	AT1G76020	9.79901e-06	-2.08623
245242_at	CH1	CH1 (CHLORINA 1); chlorophyllide a oxygenase	AT1G44446	7.96481e-05	-3.49385
259520_at	---	unknown protein	AT1G12320	5.51317e-05	-2.51483
253215_at	---	nodulin family protein	AT4G34950	0.000115917	2.3597
259061_at	AtRABA5b	AtRABA5b (Arabidopsis Rab GTPase homolog A5b); GTP binding	AT3G07410	0.000529859	2.20533
256743_at	---	unknown protein	AT3G29370	3.53141e-05	-3.75772
257094_at	---	tetraacyldisaccharide 4'-kinase family protein	AT3G20480	0.00536076	-1.68546
245293_at	---	heat shock protein 70, putative / HSP70, putative	AT4G16660	0.00535538	-1.64192
251436_at	ARGOS	ARGOS (AUXIN-REGULATED GENE INVOLVED IN ORGAN SIZE)	AT3G59900	2.46687e-07	-9.33701
255551_at	KCO5	KCO5 (CA2+ ACTIVATED OUTWARD RECTIFYING K+ CHANNEL 5); outward rectifier potassi	AT4G01840	0.000149776	-2.32339
249807_at	---	pectinacetylesterase family protein	AT5G23870	4.56796e-06	-2.90894
253137_at	---	protein kinase family protein	AT4G35500	0.000286532	1.83693
250940_at	---	auxin-responsive family protein	AT5G03310	6.99191e-07	-5.95082
257074_at	---	unknown protein	AT3G19660	0.000535024	1.74887
253819_at	---	lectin protein kinase family protein	AT4G28350	0.00344205	-1.87726
264483_at	---	tetratricopeptide repeat (TPR)-containing protein	AT1G77230	0.00272003	-1.78099
249361_at	---	protein kinase, putative	AT5G40540	7.59391e-05	5.46537
249521_at	---	FUNCTIONS IN: molecular_function unknown; INVOLVED IN: biological_process unknow	AT5G38690	0.00166904	1.67349
267361_at	---	acid phosphatase class B family protein	AT2G39920	0.000513365	1.93536
256528_at	ZFP4	ZFP4 (ZINC FINGER PROTEIN 4); nucleic acid binding / transcription factor/ zinc	AT1G66140	0.000139765	4.52917
266572_at	---	HNH endonuclease domain-containing protein	AT2G23840	4.86624e-05	-2.9292
258293_at	PHO1	PHO1 (phosphate 1)	AT3G23430	0.0157929	-2.49607
245281_at	CLA1	CLA1 (CLOROPLASTOS ALTERADOS 1); 1-deoxy-D-xylulose-5-phosphate synthase	AT4G15560	0.000254713	-2.16212
261579_at	AtPPa1	AtPPa1 (Arabidopsis thaliana pyrophosphorylase 1); inorganic diphosphatase	AT1G01050	2.26684e-05	1.78261
252204_at	---	unknown protein	AT3G50340	4.89729e-05	-1.85331
253943_at	---	small conjugating protein ligase	AT4G27030	0.000103371	-6.54097
246594_at	P5CR	P5CR (PYRROLINE-5- CARBOXYLATE (P5C) REDUCTASE); pyrroline-5-carboxylate reducta	AT5G14800	5.19563e-06	2.27086
249640_at	CAT3	CAT3 (CATIONIC AMINO ACID TRANSPORTER 3); basic amino acid transmembrane transpo	AT5G36940	0.000766749	-1.68894
259070_at	DGD1	DGD1 (DIGALACTOSYL DIACYLGLYCEROL DEFICIENT 1); UDP-galactosyltransferase/ galac	AT3G11670	4.0744e-06	-1.72524
250669_at	PGIP2	PGIP2 (POLYGALACTURONASE INHIBITING PROTEIN 2); protein binding	AT5G06870	0.00137476	-2.25037
260664_at	ATRL5	ATRL5 (ARABIDOPSIS RAD-LIKE 5); DNA binding / transcription factor	AT1G19510	0.000936922	-3.604
252885_at	GR-RBP8	GR-RBP8; RNA binding / nucleic acid binding / nucleotide binding	AT4G39260	8.62948e-06	2.07884
251870_at	---	early-responsive to dehydration protein-related / ERD protein-related	AT3G54510	0.0060014	-2.05699
246144_at	---	dynein light chain, putative	AT5G20110	0.000898145	1.82112
246004_at	GER3	GER3 (GERMIN 3); oxalate oxidase	AT5G20630	2.2668e-05	13.4156
262093_at	---	leucine-rich repeat family protein / protein kinase family protein	AT1G56145	0.000274278	1.78363
245853_at	---	unknown protein	AT5G13500	0.00458279	-1.68712
254815_at	SKU5	SKU5; copper ion binding / oxidoreductase	AT4G12420	0.000450542	-1.88575
245696_at	PKS4	PKS4 (phytochrome kinase substrate 4)	AT5G04190	1.37629e-05	-12.3034
264551_at	---	glucan endo-1,3-beta-glucosidase-related	AT1G09460	0.000659971	-3.03185
263890_at	---	auxin-responsive family protein	AT2G37030	3.04572e-06	-4.89689
262263_at	PIN3	PIN3 (PIN-FORMED 3); auxin:hydrogen symporter/ transporter	AT1G70940	0.00247493	-1.56561
265354_at	ADF5	ADF5 (ACTIN DEPOLYMERIZING FACTOR 5); actin binding	AT2G16700	9.27849e-05	2.71427
247462_at	---	protease inhibitor/seed storage/lipid transfer protein (LTP) family protein	AT5G62080	4.19505e-05	-30.3562
245362_at	HAT1	HAT1; DNA binding / transcription factor	AT4G17460	4.05607e-06	-3.49548
246011_at	---	TCP family transcription factor, putative	AT5G08330	3.70322e-06	-3.55084
263653_at	ERS2	ERS2 (ETHYLENE RESPONSE SENSOR 2); ethylene binding / glycogen synthase kinase 3	AT1G04310	3.59083e-05	-2.54574
248350_at	---	protease inhibitor/seed storage/lipid transfer protein (LTP) family protein	AT5G52160	0.00773663	-5.91857
258764_at	---	pectinesterase, putative	AT3G10720	0.000280204	-4.31373
262844_at	---	enzyme inhibitor/ pectinesterase/ pectinesterase inhibitor	AT1G14890	1.63439e-06	-2.85932
254024_at	---	pathogenesis-related protein, putative	AT4G25780	0.000300261	-2.85499
246935_at	EBF2	EBF2 (EIN3-BINDING F BOX PROTEIN 2); protein binding	AT5G25350	0.000633901	-2.00799
261401_at	---	ATP binding / kinase/ protein kinase/ protein serine/threonine kinase/ protein t	AT1G79640	0.00222337	1.86777
262452_at	---	unknown protein	AT1G11210	2.3644e-06	8.0362
249732_at	---	glucosamine/galactosamine-6-phosphate isomerase-related	AT5G24420	1.85256e-05	-17.2589
260151_at	---	unknown protein	AT1G52910	0.00162186	2.64955
253322_at	---	unknown protein	AT4G33980	9.00962e-05	6.65967
247407_at	---	unknown protein	AT5G62900	8.33298e-06	2.02866
246214_at	HSF4	[AT4G36988, CPuORF49 (Conserved peptide upstream open reading frame 49)];[AT4G36	AT4G36988	0.00809359	1.71814
253854_at	---	FUNCTIONS IN: molecular_function unknown; INVOLVED IN: biological_process unknow	AT4G27900	0.000166756	-2.15825
255403_at	DFL2	DFL2 (DWARF IN LIGHT 2)	AT4G03400	4.92182e-05	-4.00406
266300_at	PIN4	PIN4 (PIN-FORMED 4); auxin:hydrogen symporter/ transporter	AT2G01420	0.00072169	-1.80787
259076_at	TMAC2	TMAC2 (TWO OR MORE ABRES-CONTAINING GENE 2)	AT3G02140	0.000297528	-2.30496
264124_at	ATOCT2	ATOCT2 (ARABIDOPSIS THALIANA ORGANIC CATION/CARNITINE TRANSPORTER 2); carbohydra	AT1G79360	1.28972e-05	-4.62518
258105_at	---	UBX domain-containing protein	AT3G23605	0.00107078	1.804
252343_at	---	phosphoesterase family protein	AT3G48610	0.000881782	-1.84055
257413_at	---	RNA recognition motif (RRM)-containing protein	AT1G22910	0.00105375	-2.30154
250062_at	---	AAA-type ATPase family protein	AT5G17760	0.000418253	12.7857
261125_at	---	zinc finger (CCCH-type) family protein	AT1G04990	2.85083e-05	2.85241
261055_at	---	aspartyl protease family protein	AT1G01300	0.00735778	-1.56607
261480_at	PKS2	PKS2 (PHYTOCHROME KINASE SUBSTRATE 2)	AT1G14280	5.77531e-06	-6.69558
260012_at	---	unknown protein	AT1G67865	6.74452e-05	-3.69541
261318_at	---	unknown protein	AT1G53035	0.00012264	5.49725
261203_at	---	unknown protein	AT1G12845	1.89438e-07	11.8517
262793_at	CYP71B7	CYP71B7; electron carrier/ heme binding / iron ion binding / monooxygenase/ oxyg	AT1G13110	0.00052779	-2.01787
247162_at	---	xyloglucan:xyloglucosyl transferase, putative / xyloglucan endotransglycosylase,	AT5G65730	4.43161e-05	-5.07501
253608_at	XTH19	XTH19 (XYLOGLUCAN ENDOTRANSGLUCOSYLASE/HYDROLASE 19); hydrolase, acting on glyco	AT4G30290	4.11455e-05	15.638
260831_at	---	glutaredoxin family protein	AT1G06830	2.91989e-05	-6.25339
256676_at	SEX4	SEX4 (STARCH-EXCESS 4); polysaccharide binding / protein tyrosine/serine/threoni	AT3G52180	0.000150329	2.63563
259093_at	---	unknown protein	AT3G04860	0.00133402	1.66884
246724_at	---	myb family transcription factor	AT5G29000	2.07233e-05	2.16844
250007_at	BMY3	BMY3; beta-amylase/ catalytic/ cation binding	AT5G18670	0.000287373	-3.35252
245765_at	---	leucine-rich repeat family protein	AT1G33600	0.000370609	-1.64736
261981_at	---	GDSL-motif lipase/hydrolase family protein	AT1G33811	0.00153278	2.07449
248027_at	ATKCO1	ATKCO1; calcium-activated potassium channel/ ion channel/ outward rectifier pota	AT5G55630	0.000212711	-2.25246
258796_at	WDL1	WDL1	AT3G04630	0.00113617	1.93734
253411_at	ATH1	ATH1 (ARABIDOPSIS THALIANA HOMEOBOX GENE 1); DNA binding / sequence-specific DNA	AT4G32980	3.77351e-05	4.25314
250043_at	---	GDSL-motif lipase/hydrolase family protein	AT5G18430	0.000611383	2.72965
246254_at	ATMPK14	ATMPK14 (Mitogen-activated protein kinase 14); MAP kinase/ kinase	AT4G36450	0.0127769	1.64332
264091_at	---	protein binding / zinc ion binding	AT1G79110	5.76837e-05	4.99948
263174_at	ESP	ESP (EPITHIOSPECIFIER PROTEIN); enzyme regulator	AT1G54040	1.04451e-05	-5.5626
259303_at	---	unknown protein	AT3G05130	0.000102983	2.38517
248252_at	AGP22	AGP22 (ARABINOGALACTAN PROTEIN 22)	AT5G53250	0.000514209	-4.3518
262232_at	---	unknown protein	AT1G68600	0.00341887	1.98133
259671_at	---	protein kinase family protein	AT1G52290	3.107e-05	-3.06866
248566_s_at	ATFRO7	[AT5G49740, ATFRO7 (FERRIC REDUCTION OXIDASE 7); ferric-chelate reductase/ oxido	AT5G49740	3.1922e-05	-4.2803
251418_at	---	LOCATED IN: chloroplast; EXPRESSED IN: 19 plant structures; EXPRESSED DURING: 13	AT3G60440	1.06423e-05	6.08576
256192_at	ATNUDX25	ATNUDX25 (ARABIDOPSIS THALIANA NUDIX HYDROLASE HOMOLOG 25); bis(5'-nucleosyl)-te	AT1G30110	1.51488e-05	8.35186
253066_at	ACS8	ACS8; 1-aminocyclopropane-1-carboxylate synthase	AT4G37770	0.00099102	-4.32599
246855_at	---	meprin and TRAF homology domain-containing protein / MATH domain-containing prot	AT5G26280	0.000106941	7.4097
261772_at	---	unknown protein	AT1G76240	4.23996e-05	-3.18938
247878_at	---	unknown protein	AT5G57760	2.33964e-05	-20.1294
254572_at	---	alcohol oxidase-related	AT4G19380	0.00102212	-1.9142
258003_at	EXPA5	EXPA5 (EXPANSIN A5)	AT3G29030	2.59407e-06	-5.96958
257367_at	---	unknown protein	AT2G25780	2.8345e-05	-4.44633
254785_at	FLA2	FLA2 (FASCICLIN-LIKE ARABINOGALACTAN 2)	AT4G12730	0.000197472	-3.25701
253423_at	IAA29	IAA29 (INDOLE-3-ACETIC ACID INDUCIBLE 29); transcription factor	AT4G32280	1.66188e-06	-9.24045
255296_at	---	FUNCTIONS IN: molecular_function unknown; INVOLVED IN: biological_process unknow	AT4G04790	0.000299927	-2.4335
250327_at	---	unknown protein	AT5G12050	4.21315e-05	-9.42066
250475_at	SULTR2;1	AST68; sulfate transmembrane transporter	AT5G10180	7.42672e-06	-5.5216
266799_at	ATPSK2	ATPSK2 (PHYTOSULFOKINE 2 PRECURSOR); growth factor	AT2G22860	0.00246901	-11.272
251961_at	AtPPa4	AtPPa4 (Arabidopsis thaliana pyrophosphorylase 4); inorganic diphosphatase	AT3G53620	0.00213015	-1.67386
267230_at	ARL	ARL (ARGOS-LIKE)	AT2G44080	0.00331733	-4.16553
247474_at	---	unknown protein	AT5G62280	1.46729e-05	-8.08412
263216_s_at	---	[AT1G30720, FAD-binding domain-containing protein];[AT1G30730, FAD-binding domai	AT1G30720	0.000425681	-4.07059
264900_at	PIN7	PIN7 (PIN-FORMED 7); auxin efflux transmembrane transporter/ auxin:hydrogen symp	AT1G23080	7.80243e-05	-3.39563
267096_at	---	GDSL-motif lipase/hydrolase family protein	AT2G38180	0.000147121	2.99857
263963_at	---	DNA-binding protein, putative	AT2G36080	6.72058e-05	2.59904
249037_at	FLA13	FLA13 (FASCICLIN-LIKE ARABINOGALACTAN PROTEIN 13 PRECURSOR)	AT5G44130	3.44278e-05	-2.64877
262259_s_at	---	[AT1G53890, unknown protein];[AT1G53870, unknown protein]	AT1G53890	5.08544e-06	-5.68492
256883_at	---	unknown protein	AT3G26440	2.65437e-05	3.29057
250517_at	scpl35	scpl35 (serine carboxypeptidase-like 35); serine-type carboxypeptidase	AT5G08260	3.87295e-06	25.9076
254001_at	MIOX4	MIOX4; inositol oxygenase	AT4G26260	0.000127775	-30.708
257636_at	CYP71B22	CYP71B22; electron carrier/ heme binding / iron ion binding / monooxygenase/ oxy	AT3G26200	0.000264775	-4.57105
256097_at	---	unknown protein	AT1G13670	3.24739e-06	-12.3981
254697_at	---	unknown protein	AT4G17970	4.62403e-05	4.7905
262118_at	BGLU11	BGLU11 (BETA GLUCOSIDASE 11); catalytic/ cation binding / hydrolase, hydrolyzing	AT1G02850	3.09923e-07	4.15061
261327_at	---	AP2 domain-containing transcription factor TINY, putative	AT1G44830	0.000807152	-3.84442
251746_at	---	glucose-methanol-choline (GMC) oxidoreductase family protein	AT3G56060	3.39999e-06	-5.93471
247452_at	CDF1	CDF1 (CYCLING DOF FACTOR 1); DNA binding / protein binding / transcription facto	AT5G62430	1.54296e-06	-8.55943
255177_at	ACS11	ACS11; 1-aminocyclopropane-1-carboxylate synthase	AT4G08040	5.33555e-05	-15.5194
255694_at	UNE10	UNE10 (unfertilized embryo sac 10); DNA binding / transcription factor	AT4G00050	9.0429e-06	-4.53512
256527_at	---	thionin, putative	AT1G66100	2.63681e-07	-107.019
